# Supplementary material
Source: publisher figshare collection journal article supplement (https://frontiersin.figshare.com/ndownloader/files/15203426)
Supplement: Supplementary file 1 [file 15203426]

**ADVANCES IN THE KNOWLEDGEMENT OF THE EQUIDS (CLARENDONIAN, EARLY AND LATE HEMPHILLIAN) FROM CENTRAL MÉXICO.**

**Oscar Carranza-Castañeda**

Centro de Geociencias, Universidad Nacional Autónoma de México, Blvd. Juriquilla No. 3001. Querétaro, 76230, Mexico.

**ELECTRONIC SUPPLEMENT**

| Table 1. Faunal assemblage of the Early-Late and Late Hemphillian associate with *Dinohippus mexicanus* from central Mexico. | | | | | | | | | | | |
| --- | --- | --- | --- | --- | --- | --- | --- | --- | --- | --- | --- |
|  | **ZACATECAS-JALISCO** | | **GUANAJUATO** | | | | | **JALISCO** | | **HIDALGO** | **NAYARIT** |
|  | Early-Late Hemphillian | | Early Hemphillian | Clarendonian | Late Hemphillian | | | Late Hemphillian | | Late Hemphillian | Late Hemphillian |
|  | Colo-Tlaltenango | Juchipila basin. | Neutla | Escobedo | San Miguel de Allende Basin | | | Tecolotlán Basin | | Tepeji Del Río | Gigante-Trapiche |
|  |  |  | Palmillas | Soria | Rancho El Ocote | Coecillos | Rinconada | Santa María | San José | La Plegaria |  |
| **Order xenartra** |  |  |  |  |  |  |  |  |  |  |  |
| *Pliometanastes* |  | X |  |  |  |  |  |  |  |  |  |
| *Megalonyx* |  |  |  |  | x | ? |  | X | X | ? | X |
| *Zacatzontli tecolotlanensiss* |  |  |  |  |  |  |  | X | X |  |  |
| Paramylodon |  |  |  |  | * |  |  |  |  |  |  |
| **Order lagomorpha** |  |  |  |  |  |  |  |  |  |  |  |
| *Notolagus velox* |  |  |  |  | X | ? |  |  |  |  |  |
| *Hypolagus sp.* |  |  |  |  | X |  |  | X |  |  |  |
| **Order Rodentia** |  |  |  |  |  |  |  |  |  |  |  |
| *Prosigmodon oroscoi* |  |  |  |  | x |  |  |  |  |  |  |
| *Prosigmodon ferrusquiae* |  |  |  |  | x |  |  |  |  |  |  |
| *Prosigmodon* sp. |  |  |  |  |  |  |  | X |  |  |  |
| *Copemys* sp. |  |  |  |  |  |  |  | X |  |  |  |
| *Neotoma sawroksensis* |  |  |  |  | X |  |  |  |  |  |  |
| **Order Carnivora** |  |  |  |  |  |  |  |  |  |  |  |
| *Agriotherium scheneideri* |  |  |  |  | X | X | X |  | X |  | ? |
| *Canis ferox* |  |  |  |  | X |  | X | ? |  | X |  |
| *Borophagus secundus* |  |  |  |  | X | X | X | X | X |  |  |
| *Pseudaelurus intrepidus* |  |  |  |  | X |  | X |  |  |  |  |
| *Machairodus* Cf. *M. coloradensis* |  |  |  |  | X |  | X | X | X | X | ? |
| *Taxidea mexicana* |  |  |  |  |  |  | X |  |  |  |  |
| *Conepatus sanmiguelensis* |  |  |  |  |  | X |  |  |  |  |  |
| **Order Proboscidea** |  |  |  |  |  |  |  |  |  |  |  |
| *Gomphotherium hondurensis* |  |  |  |  |  |  |  | X | X |  | ? |
|  |  |  |  |  |  |  |  |  |  |  |  |
| **Order Perissodactyla** |  |  |  |  |  |  |  |  |  |  |  |
| *Protohippus* sp. |  |  |  | X |  |  |  |  |  |  |  |
| *Hipparion* sp. |  |  |  | X |  |  |  |  |  |  |  |
| *Calippus martin****i*** |  |  | X |  |  |  |  |  |  |  |  |
| *Calippus hondurensis* | X | X |  |  | X |  |  |  |  |  |  |
| *Dinohippus interpolatus* |  |  |  |  |  |  |  |  |  |  |  |
| *Astrohippus ansae* |  | X |  |  |  |  |  |  |  |  |  |
| *Nannippus aztecus* |  |  |  |  | X | X | X | x |  |  |  |
| *Neohipparion eurystyle* | X | X |  |  | X | X | X | x | X | X | X |
| *Astrohippus stockii* | X |  |  |  | X | X | X | x | X | X |  |
| *Dinohippus mexicanus* | X | X |  |  | X | X | X | X | X | X | X |
| *Teleoceras fossiger* |  | X |  |  | X | ? | X | X | X | X | X |
|  |  |  |  |  |  |  |  |  |  |  |  |
| **Order Artiodactyla** |  |  |  |  |  |  |  |  |  |  |  |
| *Cosoryx* sp. |  | X | ? |  |  |  |  |  |  |  |  |
| *Plioceros* sp. |  | X |  |  |  |  |  |  |  |  |  |
| *Sphenophalos* |  | X |  |  |  |  |  |  |  |  |  |
| *Alforjas* sp. |  |  |  |  | X | ? | X | X |  |  |  |
| *Alforjas taylori* |  | X |  |  |  |  |  |  |  | X |  |
| *Megatylopus mattewi* |  |  | ? |  | X |  | X | X | X | X | X |
| *Hemiauchenia vera* |  |  |  |  | X | X | X | X | X | X |  |
| *Hexobelomeryx fricki* |  |  |  |  | X | X | X | X | X | ? |  |
| *Catagonus brachydontus* | X |  |  |  | X | X | ? | X | X |  |  |
| *Texoceros* sp. |  |  |  |  | X |  |  |  |  | X |  |

| Table 2. Comparison of symphysis and incisors of Dinohippus mexicanus, from central Mexico. All dimension in millimeters. | | | | | | | | | |
| --- | --- | --- | --- | --- | --- | --- | --- | --- | --- |
|  | p2-m3 | Deep of jaw M1 | Precanine | postcanine | Widht between | | Incisivos | widht incisives | | |
|  |  |  | Diastema | Diastema | Mentonian foramen | |  | Incisive row |  | |
| ZacJuch 1683 | 147.78 |  | 9.36 | 69.98 | 35.32 |  | i-1-3 r and l | Flat | Infundibulum | |
| GTO 3946 GTO 2B | 153.77 | 113.04~ | 6.8 | 68.53 | 39.15~ |  | L i2-3 R i1-3 | Rounded | Infundibulum | |
| GTO2 A 5125 | P2-M1 142,47 | 100.85 | 9.95 | 78.06 | 43.03~ |  | l AND r I1-2 | Flat | not infundibulum | |
| GTO 75 857 | 158.7 |  | 8.74 | 71.89 | 40.33~ |  | L I1-3 R I 2-3 | Rounded | not infundibulum | |
| GTO 43 5136 | 152.64 | 89.29 | 9.6 | 62,43 | 37.69 |  | Ri1-3 | Rounded | pointed Infundibulum | |
| GTO 2 3018 |  |  |  |  |  |  | R and Li 1-3 | R and L I1-3 | Infundibulum | |
| GTO 43 3764 |  |  |  |  |  |  | R and L i1-3 | Flat | Infundibulum | |
